# Supplementary material
Source: PubMed Central journal article supplement (PMC3416463)
Supplement: supp_80.7.2570_IAI-IAI06098-11-s01.pdf [file supp_80.7.2570_IAI-IAI06098-11-s01.pdf]

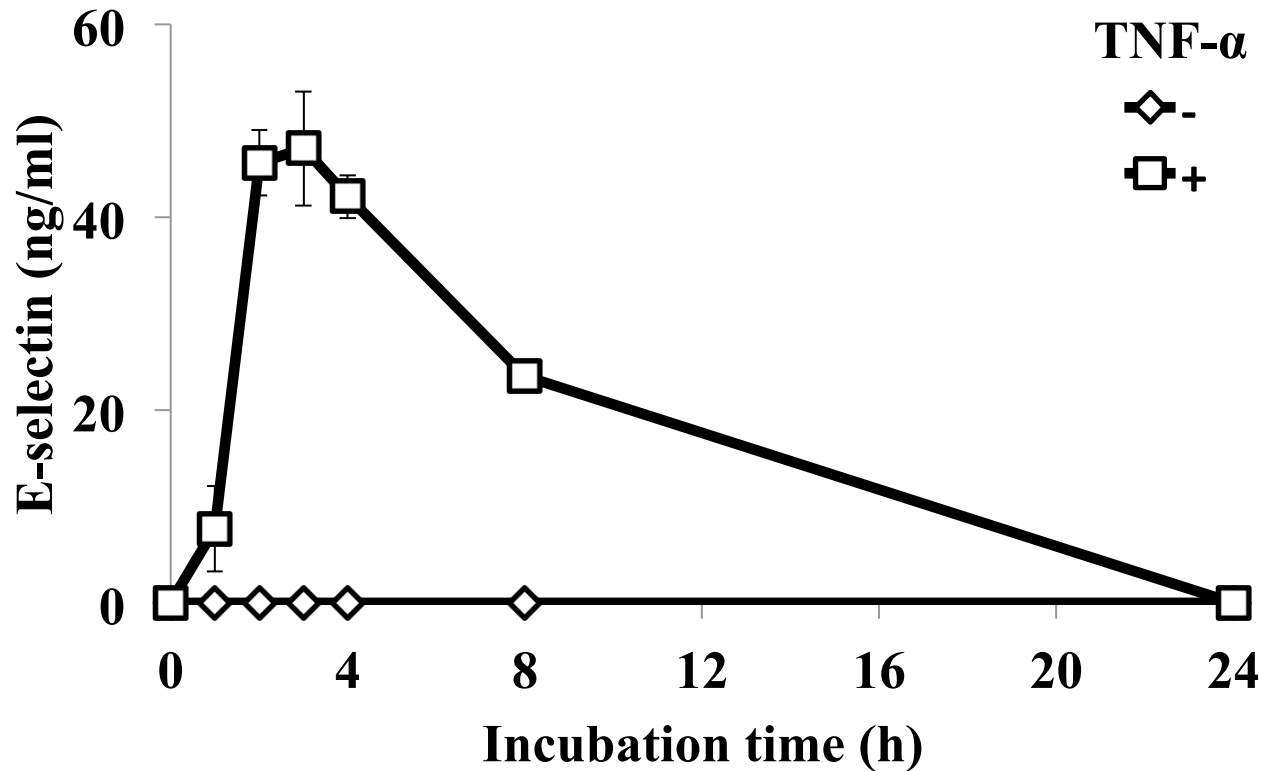

**Supplemental data #1. TNF- $\alpha$  activates production of E-selectin in human endothelial cells.** HUVECs were incubated with TNF- $\alpha$  (10 ng/ml) for 24 h. Concentrations of E-selectin in cell lysates were analyzed by ELISA (n = 3, means  $\pm$  SD).

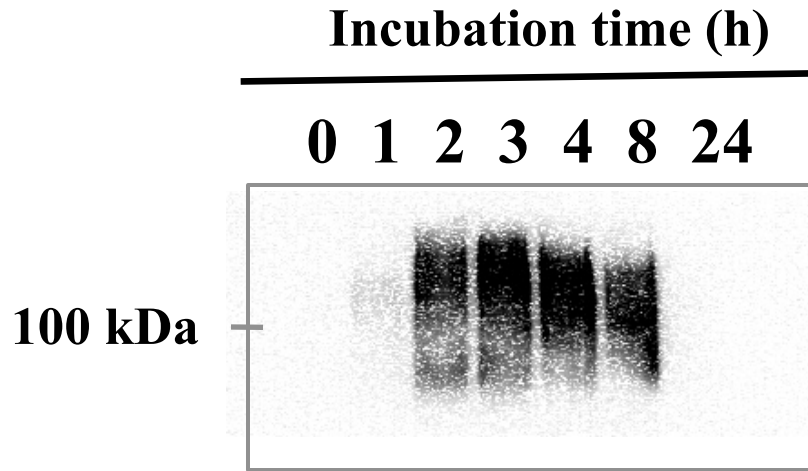

**Supplemental data #2. TNF- $\alpha$  activates production of E-selectin in human endothelial cells.** HUVECs were incubated with TNF- $\alpha$  (10 ng/ml) for 0 - 24 h. Then total cell lysates were immunoblotted with an antibody against human E-selectin.

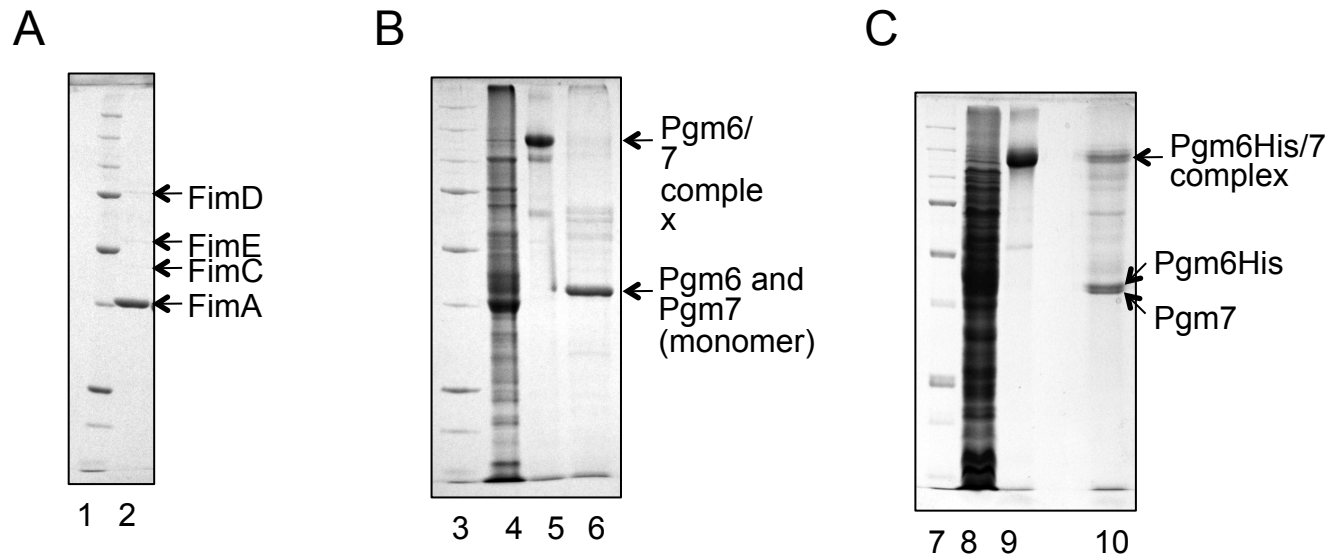

**Supplemental data #3. SDS-PAGE gel images of purified samples; FimA fimbriae (A), Pgm6/7 complex (B), and complex of His-tagged Pgm6 (Pgm6His) and Pgm7 (C).** Lanes 1, 3 and 7 are molecular marker (250, 150, 100, 75 (thick), 50 (thick), 37, 25, 20 (thick) and 15 kDa from top). Lane 2 is purified FimA fimbriae. Lane 4 is whole cell of *P. gingivalis* ATCC 33277, and lanes 5 and 6 are purified Pgm6/7 from the strain. Lane 8 is whole cell of *P. gingivalis* ATCC 33277 *Dp gm6* complemented with *pgm6his*, and lanes 9 and 10 are purified Pgm6His/Pgm7 from the strain. Lanes 2, 6 and 10 were denatured in SDS buffer with 2-mercaptoethanol at 100°C for 5 min. Lanes 4, 5, 8 and 9 were denatured in SDS buffer without 2-mercaptoethanol at 100°C for 5 min. Purified FimA fimbriae contains minor components of FimC, FimD and FimE as well as FimA. Pgm6/7 complex formation is necessary for disulfide bonds, therefore they are dissociated under the reducing condition. Pgm6 (41 kDa) and Pgm7 (40 kDa) monomers were not distinguished by SDS-PAGE as shown lane 6 in panel B, but Pgm6His and Pgm7 showed different mobility because Pgm6 got heavy by addition of hexahistidine.

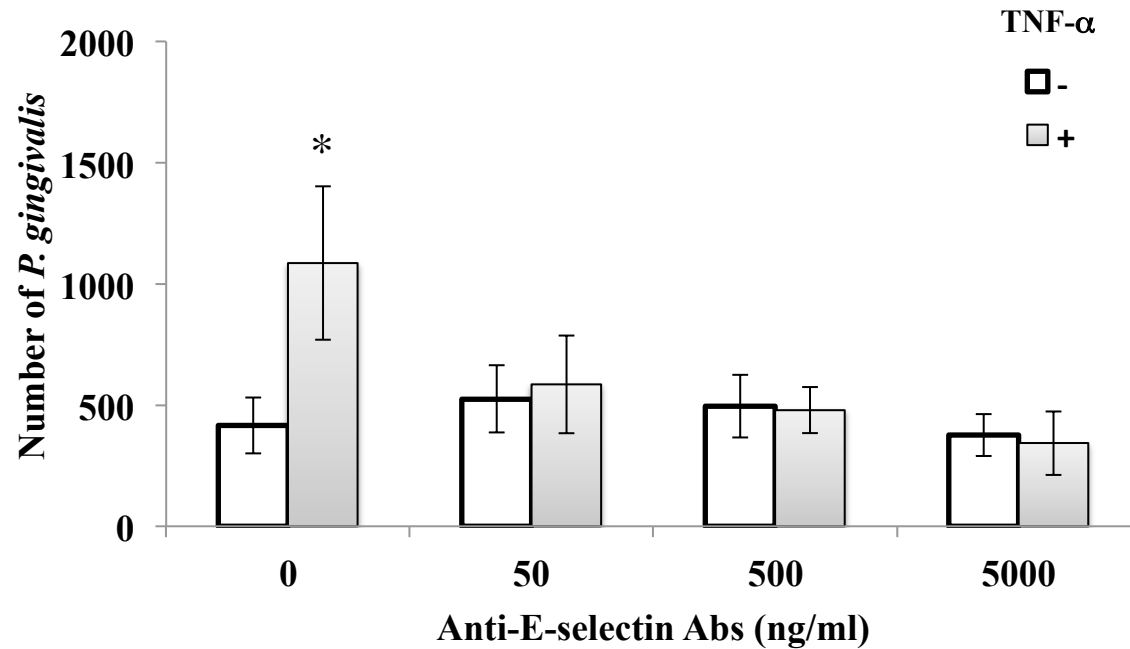

**Supplemental data #4. Inhibitory effect of anti-E-selectin antibodies on adherence of *P. gingivalis* to HUVECs.** HUVECs were incubated with TNF- $\alpha$  (10 ng/ml) for 3 h. Cells were then washed and incubated with *P. gingivalis* ATCC 33277 ( $10^8$  cells/ml/well) for 30 min in the presence of 50, 500, and 5000 ng/ml of an antibody for E-selectin. Other procedures are described in the legend to Fig. 1B. (n = 3, means  $\pm$  SD; \* $P$  < 0.01 vs no TNF- $\alpha$ ). .
